# Supplementary material for: Phase and shape controlled VO2 nanostructures by antimony doping
Source: Royal Society of Chemistry journal article supplement (doi:10.1039/c2ee22290f), 2012-01-01
Supplement: c2ee22290f.pdf [file c2ee22290f.pdf]

## Supporting information

### Phase and shape controlled VO<sub>2</sub> nanostructures by antimony doping

*Yanfeng Gao,<sup>1,\*</sup> Chuanxiang Cao,<sup>1</sup> Lei Dai,<sup>1,2</sup> Hongjie Luo,<sup>3</sup> Minoru Kanehira,<sup>1</sup>  
Yong Ding,<sup>4</sup> and Zhong Lin Wang<sup>4,\*</sup>*

<sup>1</sup> State Key Laboratory of High Performance Ceramics and Superfine Microstructure, Shanghai Institute of Ceramics (SIC), Chinese Academy of Sciences (CAS), Dingxi 1295, Changning, Shanghai, 200050, China

<sup>2</sup> Graduate University of Chinese Academy of Sciences, Yuquanlu 19, Beijing, 100049, China

<sup>3</sup> Shanghai Institute of Ceramics (SIC), Chinese Academy of Sciences (CAS), Dingxi 1295, Changning, Shanghai, 200050, China

<sup>4</sup> School of Materials Science and Engineering, Georgia Institute of Technology, 771 Ferst Dr. N.W., Atlanta, GA 30332

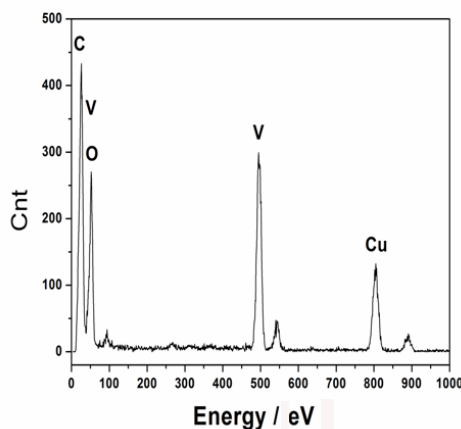

Figure S1 The EDS pattern taken from powders prepared by the hydrothermal treatment below 240 °C.

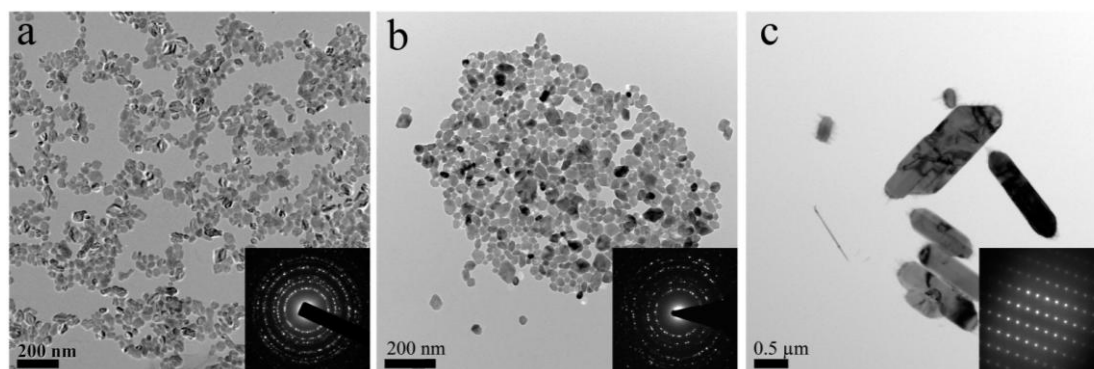

Figure S2 TEM images (inset, the SAED pattern) of the  $\text{VO}_2$  powders prepared by the hydrothermal treatment at 260 °C for 12 h with 3% dopants of: a)  $\text{Ti}^{3+}$ , b)  $\text{Bi}^{3+}$ , and c)  $\text{Sb}^{5+}$ .

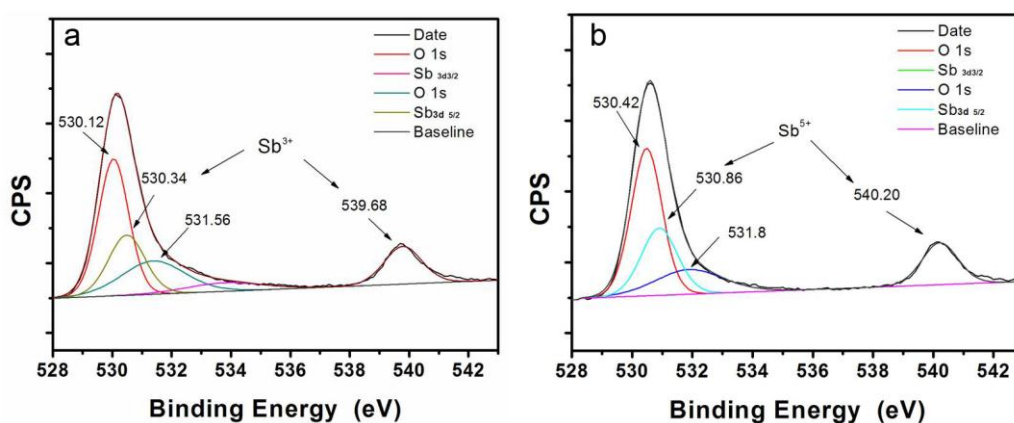

Figure S3. XPS pattern of the  $\text{VO}_2$  powders prepared by adding different oxidation states of the Sb: a)  $\text{Sb}_2\text{O}_3$  b)  $\text{Sb}_2\text{O}_5$ .
